# Supplementary material
Source: PubMed Central journal article supplement (PMC4484265)

Supplementary Figure 1 Intracolonic administration of as-miR-133a attenuated DSS-induced colitis development in wild type mice. (A) Percentage body weight loss in C57BL6/J mice intracolonicly administered with as-miR-133a and its control treated with DSS. \*P<0.05, compared to mice administered with control as-miRNA (B) Levels of TNF- $\alpha$  and (C) IL-1 $\beta$  in colon tissues from C57BL6/J mice intracolonicly administered with as-miR-133a and its control were analyzed using qPCR analysis. \*P<0.05, compared to mice administered with control as-miRNA.

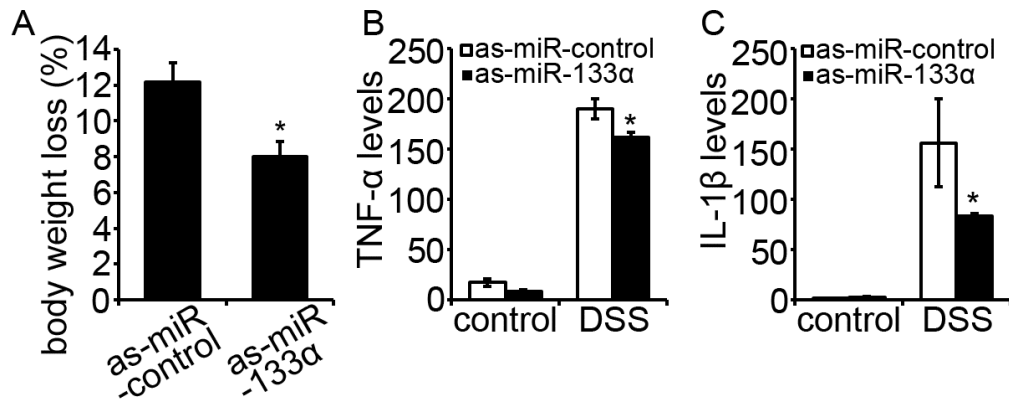

Supplement: gutjnl-2014-307329-s2.pdf [file gutjnl-2014-307329-s2.pdf]
